# Supplementary material
Source: Springer Nature journal article supplement (https://www.springermedizin.de/resource/supplementary/12891_2012_1609_MOESM10_ESM.docx/9509062)
Supplement: MOESM10 [file 9509062]

Fig. 4B.
